# Supplementary material for: Selenium and Copper as Biomarkers for Pulmonary Arterial Hypertension in Systemic Sclerosis
Source: PubMed Central journal article supplement (PMC7353414; doi:10.3390/nu12061894), 2020-06-25
Supplement: nutrients-12-01894-s001.pdf [file nutrients-12-01894-s001.pdf]

1 Article

2 **Selenium and copper as biomarkers for pulmonary**  
 3 **arterial hypertension in systemic sclerosis**

4 Qian Sun<sup>1</sup>, Julian Hackler<sup>1</sup>, Julia Hilger<sup>2</sup>, Hans Gluschke<sup>1</sup>, Aldina Muric<sup>1</sup>, Szandor Simmons<sup>3</sup>,  
 5 Lutz Schomburg<sup>1,\*</sup> and Elise Siegert<sup>2,\*</sup>

6

7

8 **Supplementary Material**

9

10 **Table S1.** Prevalence of Se status below (< RefR) or above reference range (> RefR) in SSc patients and HC

11

|                     | Reference range  | < RefR [%] |                 |      | > RefR [%] |                 |      |
|---------------------|------------------|------------|-----------------|------|------------|-----------------|------|
|                     |                  | SSc-PAH    | SSc without PAH | HC   | SSc-PAH    | SSc without PAH | HC   |
| Se [µg/L]           | 52.1–125.1 [17]* | 16.0       | 14.6            | 0.0  | 0.0        | 10.0            | 10.0 |
| SELENOP [mg/L]      | 2.9–6.1 [17]*    | 64.0       | 41.5            | 10.0 | 0.0        | 0.0             | 0.0  |
| GPx3 activity [U/L] | 196-477 [38]**   | 28.0       | 19.5            | 0.0  | 0.0        | 2.4             | 0.0  |

12 \*Reference ranges for Se and SELENOP according to the 5<sup>th</sup>-95<sup>th</sup> percentile of 598 healthy subjects from the  
 13 European prospective investigation of cancer and nutrition cohort (EPIC) study. \*\*Reference range for  
 14 GPx3 activity according to a cross-sectional study of a healthy population (n = 287) from the province of  
 15 Valencia, Spain.

16 **References**

17 17. Hughes, D.J.; Fedirko, V.; Jenab, M.; Schomburg, L.; Meplan, C.; Freisling, H.; Bueno-de-  
 18 Mesquita, H.B.; Hybsier, S.; Becker, N.P.; Czuban, M., et al. Selenium status is associated with  
 19 colorectal cancer risk in the european prospective investigation of cancer and nutrition cohort. *Int J*  
 20 *Cancer* 2015, 136, 1149-1161.

21 38. Alegria, A.; Barbera, R.; Clemente, G.; Farre, R.; Garcia, M.J.; Lagarda, M.J. Selenium and  
 22 glutathione peroxidase reference values in whole blood and plasma of a reference population living  
 23 in valencia, spain. *J Trace Elem Med Biol* 1996, 10, 223-228.

24

25

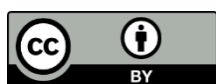

© 2020 by the authors. Submitted for possible open access publication under the terms  
 and conditions of the Creative Commons Attribution (CC BY) license  
 (<http://creativecommons.org/licenses/by/4.0/>).

26
